# Supplementary material
Source: PubMed Central journal article supplement (PMC4485220)
Supplement: DS_10.1177_0022034515572441.pdf [file DS_10.1177_0022034515572441.pdf]

# DMP I-derived Peptides Promote Remineralization of Human Dentin

Journal of Dental Research  
DSI-DS2  
© International & American Associations  
for Dental Research 2015  
Reprints and permissions:  
sagepub.com/journalsPermissions.nav  
DOI: 10.1177/0022034515572441  
jdr.sagepub.com

J.D. Padovano<sup>1</sup>, S. Ravindran<sup>1</sup>, P.T. Snee<sup>3</sup>, A. Ramachandran<sup>1</sup>,  
A.K. Bedran-Russo<sup>2</sup>, and A. George<sup>1</sup>

## Appendix

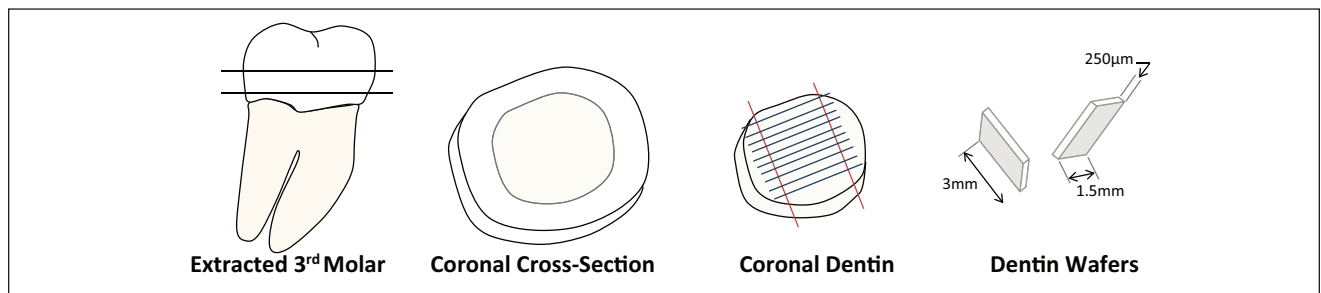

**Appendix Figure 1.** A schematic representation showing the preparation of the dentin wafers used in remineralization studies.

<sup>1</sup>Brodie Tooth Development Genetics & Regenerative Medicine Research Laboratory, Department of Oral Biology, University of Illinois at Chicago, Chicago, IL, USA

<sup>2</sup>Department of Restorative Dentistry, College of Dentistry, University of Illinois at Chicago, Chicago, IL, USA

<sup>3</sup>Department of Chemistry, College of Liberal Arts and Sciences, University of Illinois at Chicago, Chicago, IL, USA

**Corresponding Author:**

A. George, Department of Oral Biology, University of Illinois at Chicago, Chicago, IL 60612, USA.

Email: anneg@uic.edu

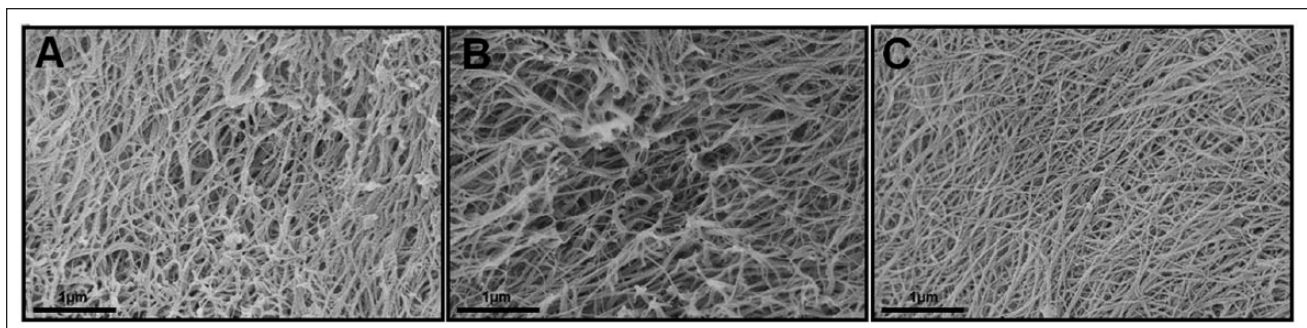

**Appendix Figure 2.** Scanning electron microscopy images of collagenase-challenged dentin. **(A)** Dentin that underwent 2 h of collagenase challenge. Note the intact type I collagen structure. **(B)** Represents 6 h of collagenase-challenged dentin, which displays a disorganized matrix. **(C)** The collapsed matrix of dentin that was collagenase-challenged for 18 h.

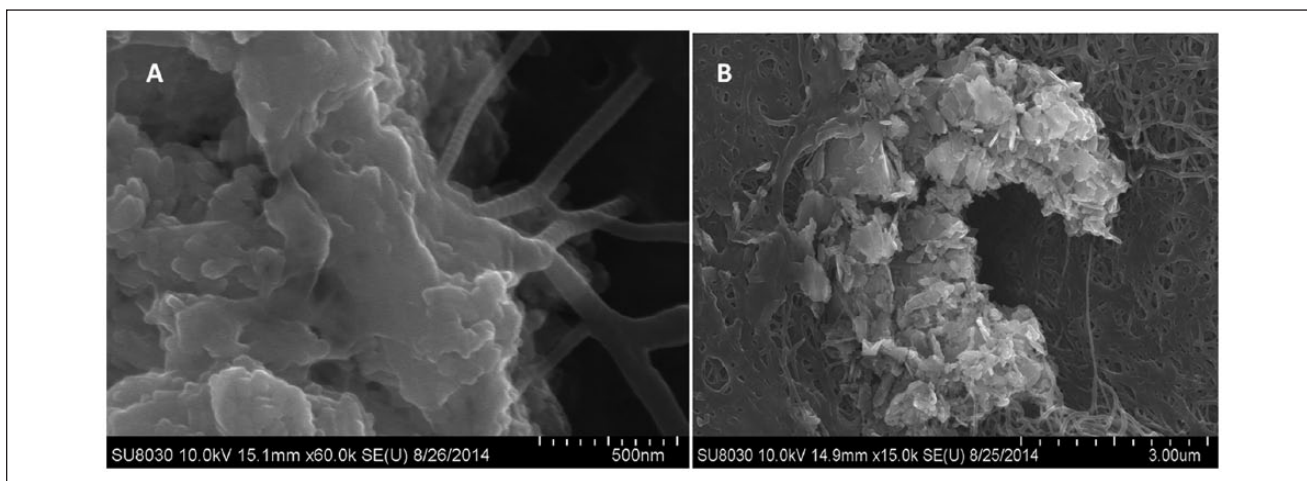

**Appendix Figure 3.** Scanning electron microscopy images of collagenase-challenged dentin coated with 1:4 ratio peptide **(A)** and DMPI **(B)**, showing HAP nucleation and growth in areas with higher densities of collagen fibrils.
